# Supplementary material for: Study protocol for a nationwide Knowledge, Attitudes and Practices (KAP) survey on diabetes in Singapore’s general population
Source: PubMed Central journal article supplement — BMJ Open. 2020 Jun 15;10(6):e037125. doi: 10.1136/bmjopen-2020-037125 (PMC7299045; doi:10.1136/bmjopen-2020-037125), 2020-06-15
Supplement: bmjopen-2020-037125.reviewer_comments.pdf [file bmjopen-2020-037125.reviewer_comments.pdf]

## PEER REVIEW HISTORY

BMJ Open publishes all reviews undertaken for accepted manuscripts. Reviewers are asked to complete a checklist review form (<http://bmjopen.bmj.com/site/about/resources/checklist.pdf>) and are provided with free text boxes to elaborate on their assessment. These free text comments are reproduced below.

### ARTICLE DETAILS

|                            |                                                                                                                                                                                                                                           |
|----------------------------|-------------------------------------------------------------------------------------------------------------------------------------------------------------------------------------------------------------------------------------------|
| <b>TITLE (PROVISIONAL)</b> | Study protocol for a nationwide Knowledge, Attitudes and Practice (KAP) Survey on Diabetes in Singapore's General Population                                                                                                              |
| <b>AUTHORS</b>             | PV, AshaRani; Abdin, Edimansyah; kumarasan, roystonn; Siva Kumar, Fiona Devi; Shafie, Saleha; Jeyagurunathan, Anitha; Chua, Boon Yiang; Vaingankar, Janhavi; Fang, Sum Chee; Lee, Eng Sing; Van Dam, Rob; Chong, Siow Ann; Subramaniam, M |

### VERSION 1 – REVIEW

|                        |                                                           |
|------------------------|-----------------------------------------------------------|
| <b>REVIEWER</b>        | Dr Kaushik Chattopadhyay<br>University of Nottingham (UK) |
| <b>REVIEW RETURNED</b> | 31-Jan-2020                                               |

|                         |                                                                                                                                                                                                                                                                                                                                                                                                                                                                                                                                                                                                                                                                                                                                                                                                                                                                                                                                                                                                                                                                                                                                                                                                                                                                                                                                          |
|-------------------------|------------------------------------------------------------------------------------------------------------------------------------------------------------------------------------------------------------------------------------------------------------------------------------------------------------------------------------------------------------------------------------------------------------------------------------------------------------------------------------------------------------------------------------------------------------------------------------------------------------------------------------------------------------------------------------------------------------------------------------------------------------------------------------------------------------------------------------------------------------------------------------------------------------------------------------------------------------------------------------------------------------------------------------------------------------------------------------------------------------------------------------------------------------------------------------------------------------------------------------------------------------------------------------------------------------------------------------------|
| <b>GENERAL COMMENTS</b> | <p><b>Abstract</b><br/>Introduction- The aim needs to be summarised properly eg the word "knowledge" appears twice/is it about KAP pertaining to prevention and detection of diabetes?<br/>Methods- should be in future tense. KAP (abbreviation) should be used.<br/>P value- less than or equal to 0.05?<br/>"The respondents will be administered questionnaires on diabetes knowledge, attitudes and practices, stigma towards diabetes, lifestyle, diet, and awareness of local diabetes campaigns" - the aim of the study is unclear/please make it (and objectives) consistent throughout the title, abstract and the main text.</p> <p><b>Background</b><br/>Diabetes- do you mean type 1 and 2? or more?<br/>Other important complications of diabetes are not mentioned.<br/>Use abbreviation (eg KAP) throughout once full form (abbreviation) has been mentioned.<br/>"The current study aims to:..." - please only state the aims/objectives (and not the methods, benefits etc)</p> <p><b>Methods</b><br/>Survey start date?<br/>Please write in the future tense.<br/>Sampling and sample release - can this be merged with general population sample and named as "Sample size calculation"?<br/>Currently, these things are unclear.<br/>P value- less than or equal to 0.05?<br/>How will you handle missing data?</p> |
|-------------------------|------------------------------------------------------------------------------------------------------------------------------------------------------------------------------------------------------------------------------------------------------------------------------------------------------------------------------------------------------------------------------------------------------------------------------------------------------------------------------------------------------------------------------------------------------------------------------------------------------------------------------------------------------------------------------------------------------------------------------------------------------------------------------------------------------------------------------------------------------------------------------------------------------------------------------------------------------------------------------------------------------------------------------------------------------------------------------------------------------------------------------------------------------------------------------------------------------------------------------------------------------------------------------------------------------------------------------------------|

|                        |                                                                           |
|------------------------|---------------------------------------------------------------------------|
| <b>REVIEWER</b>        | Mohamad Aljofan<br>School of Medicine, Nazarbayev University, Kazakhstan. |
| <b>REVIEW RETURNED</b> | 21-Feb-2020                                                               |

|                         |                                                                                                                                                                                                                                                                                                                                                                                                                                                                                                                                                                                                                                                                                                                                                                                                                                                                                                                                                                                                                                |
|-------------------------|--------------------------------------------------------------------------------------------------------------------------------------------------------------------------------------------------------------------------------------------------------------------------------------------------------------------------------------------------------------------------------------------------------------------------------------------------------------------------------------------------------------------------------------------------------------------------------------------------------------------------------------------------------------------------------------------------------------------------------------------------------------------------------------------------------------------------------------------------------------------------------------------------------------------------------------------------------------------------------------------------------------------------------|
| <b>GENERAL COMMENTS</b> | <p>Thank you for giving me the opportunity to review the paper titled “Study protocol for a nationwide Knowledge, Attitudes and Practice (KAP) Survey on Diabetes in Singapore’s General Population” that was submitted to BMJ open.</p> <p>The paper deals with an interesting and current public health topic. The paper is concise and well presented.</p> <p>However, there are a few suggestions:</p> <p>In the introduction it is worth mentioning other KAP studies that investigated diabetes. Below is an example of a recent study that is worth including:</p> <p>Aljofan M, Altebainawi A, Alrashidi MN. Public knowledge, attitude and practice toward diabetes mellitus in Hail region, Saudi Arabia. Int J Gen Med. 2019;12:255-62. Epub 2019/08/15. doi: 10.2147/ijgm.S214441. PubMed PMID: 31410048; PubMed Central PMCID: PMC6643049.</p> <p>Referencing<br/>Please change referencing style as per the journal’s guidelines<br/>The references have been added twice. Please correct.</p> <p>Good luck.</p> |
|-------------------------|--------------------------------------------------------------------------------------------------------------------------------------------------------------------------------------------------------------------------------------------------------------------------------------------------------------------------------------------------------------------------------------------------------------------------------------------------------------------------------------------------------------------------------------------------------------------------------------------------------------------------------------------------------------------------------------------------------------------------------------------------------------------------------------------------------------------------------------------------------------------------------------------------------------------------------------------------------------------------------------------------------------------------------|

### VERSION 1 – AUTHOR RESPONSE

#### Reviewer: 1

Reviewer Name: Dr Kaushik Chattopadhyay

Institution and Country: University of Nottingham (UK) Please state any competing interests or state ‘None declared’: None

Please leave your comments for the authors below Abstract

Introduction- The aim needs to be summarised properly eg the word "knowledge" appears twice/is it about KAP pertaining to prevention and detection of diabetes?

Yes, it is a knowledge attitudes and practices study pertaining to prevention and detection of diabetes as indicated in the abstract We have also amended the study aims indicated under the ‘Background’ (Page 6) to indicate this specifically.

Methods- should be in future tense. KAP (abbreviation) should be used.

We have amended the methods section as suggested. We have standardised the use of the abbreviation in the abstract Page 5, page 6 page 15, page 16, page 17 and page 18 as suggested.

P value- less than or equal to 0.05?

it is P value  $\leq 0.05$ . We have made changes in the abstract and methods (page 16).

"The respondents will be administered questionnaires on diabetes knowledge, attitudes and practices, stigma towards diabetes, lifestyle, diet, and awareness of local diabetes campaigns" - the aim of the study is unclear/please make it (and objectives) consistent throughout the title, abstract and the main text.

We have amended the abstract and the background (aims, page 6) as per the suggestion.

## Background

Diabetes- do you mean type 1 and 2? or more?

It is type 2 diabetes. We have added additional sentence to make this clear (page 5).

Other important complications of diabetes are not mentioned.

We have edited this section to include the complications endorsed by the WHO ([https://www.who.int/diabetes/action\\_online/basics/en/index3.html](https://www.who.int/diabetes/action_online/basics/en/index3.html)) as well as that based on the literature evidence (Papatheodorou et al., 2016)

Use abbreviation (eg KAP) throughout once full form (abbreviation) has been mentioned.

"The current study aims to:..." - please only state the aims/objectives (and not the methods, benefits etc)

We have amended this section as suggested (Page 5-6). The abbreviations are used in the abstract Page 5, page 6 page 15, page 16, page 17 and page 18 as suggested.

## Methods

Survey start date?

We have added this in page 7.

Please write in the future tense.

We have changed this section to future tense.

Sampling and sample release - can this be merged with general population sample and named as "Sample size calculation"? Currently, these things are unclear.

We have merged these two sections together and renamed as Sample size calculation, sampling and sample release (Page 8-9)

P value- less than or equal to 0.05?

It is P value  $\leq 0.05$  we have made the changes in the relevant sections (pages 2, 8 and 16).

How will you handle missing data?

We have included the details in page 15. [We will be using list wise deletion method to deal with missing data when analysing the dataset. However, if the proportion of missing data is significantly high, we will examine the missing data patterns, i.e. whether it is missing at random (MAR), missing completely at random (MCAR), or missing not at random (MNAR) before imputation methods are performed on the dataset.]

Reviewer: 2

Reviewer Name: Mohamad Aljofan

Institution and Country: School of Medicine, Nazarbayev University, Kazakhstan.

Please state any competing interests or state 'None declared': None declared.

Please leave your comments for the authors below Thank you for giving me the opportunity to review the paper titled "Study protocol for a nationwide Knowledge, Attitudes and Practice (KAP) Survey on Diabetes in Singapore's General Population" that was submitted to BMJ open.

The paper deals with an interesting and current public health topic. The paper is concise and well presented.

However, there are a few suggestions:

In the introduction it is worth mentioning other KAP studies that investigated diabetes. Below is an example of a recent study that is worth including:

Aljofan M, Altebainawi A, Alrashidi MN. Public knowledge, attitude and practice toward diabetes mellitus in Hail region, Saudi Arabia. Int J Gen Med. 2019;12:255-62. Epub 2019/08/15. doi: 10.2147/ijgm.S214441. PubMed PMID: 31410048; PubMed Central PMCID: PMC6643049.

We have added the references and amended the section (Page 5).

#### Referencing

Please change referencing style as per the journal's guidelines The references have been added twice. Please correct.

We have amended the reference section after inserting the new references. We checked the reference section for any duplicates and found none. The Subramaniam et al paper repeated are different papers published in different years.

Good luck.

Thank you so much for the encouragement.

### VERSION 2 – REVIEW

|                         |                                                                                                                                                                                                                                                                                                                          |
|-------------------------|--------------------------------------------------------------------------------------------------------------------------------------------------------------------------------------------------------------------------------------------------------------------------------------------------------------------------|
| <b>REVIEWER</b>         | Mohamad Aljofan<br>School of Medicine-Nazarbayev University                                                                                                                                                                                                                                                              |
| <b>REVIEW RETURNED</b>  | 29-Apr-2020                                                                                                                                                                                                                                                                                                              |
| <b>GENERAL COMMENTS</b> | Thank you for giving me the opportunity to review the revised version of the manuscript entitled "Study protocol for a nationwide Knowledge, Attitudes and Practice (KAP) Survey on Diabetes in Singapore's General Population". I am happy with the revised version of the manuscript and recommend it for publication. |
